# Supplementary material for: Damping Torque Analysis of the PMSG-Based WT with Supplementary Damping Control for Mitigating Interarea Oscillations
Source: Hindawi journal article supplement (doi:10.1155/2022/2391770), 2022-11-30
Supplement: f1 [file 2391770.f1.docx]

Table s1: Parameters of the two-area system.

| Symbol | Item | Value |
| --- | --- | --- |
| *Sb* | Base value of power | 300(MVA) |
| *Vb* | Base value of ac line voltage | 13.8 (kV) |
| *ωs* | Angular base frequency | 100π (rad/s) |
| *H*1 | Inertia Time constant of the *SG*1 | 4 (s) |
| *H*2 | Inertia Time constant of the *SG*2 | 2 (s) |

Table s2: Parameters of the PMSG wind turbine.

| Symbol | Item | Value |
| --- | --- | --- |
| *St* | Rated PMSG power | 2 (MW) |
| *Vs* | Stator rated voltage | 690 (V) |
| *I*s | Stator rated current | 1750 (A) |
| *Rt* | Resistance | 0.0068 () |
| *VDC* | DC-link voltage | 1100 (V) |
| *ωtn* | Rated speed | 2.26 (rad/s) |
| *Ht* | Inertia time constant of the PMSG | 4 (s) |
| ƒ | Switching frequency | 1 (kHz) |
| *KWT* | Droop control gain | 10 |
